# Supplementary material
Source: publisher figshare collection journal article supplement (https://adisjournals.figshare.com/ndownloader/files/38396285)
Supplement: Supplementary file 1 [file 38396285]

# Real-World Findings on the Characteristics and Treatment Exposures of Patients with Hidradenitis Suppurativa from U.S. Claims Data

Amit Garg,\* Haley B. Naik,\* Afsaneh Alavi, Paul Hazen, Jennifer L. Hsiao, Vivian Y. Shi, Jamie Weisman, Tanja Tran, Jan Rudnik, Adam Jedrzejczyk, Ingrid Pansar, Alexa B. Kimball

*\*Drs. Amit Garg and Haley B. Naik contributed equally to this work*

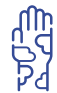

Hidradenitis suppurativa (HS) is a chronic and painful **skin disease** that has a significant **negative impact** on the **well-being of patients** and their quality of life

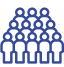

HS occurs in **approximately 0.1–1% of people in the U.S.**, however, limited awareness of HS has contributed to **diagnostic delays of 7–10 years**, on average

There is a **lack of information** available on the **care and treatment** of patients with HS

## Objective

To describe the HS patient population in the U.S. and their care in the last decade

This study was conducted using IBM MarketScan Databases:

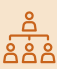

U.S. Commercial Claims and Encounters with Medicare Supplemental and Coordination of Benefits (**private insurance**), and IBM U.S. Medicaid (**public insurance**) databases were used

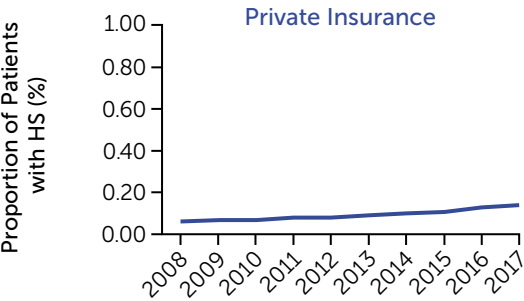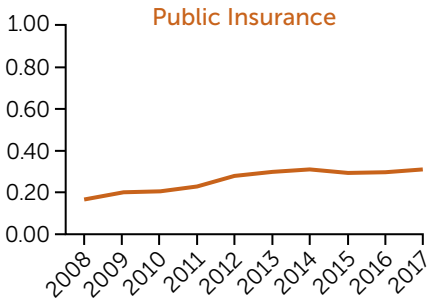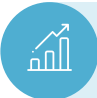

**Annual HS Cases:** The annual number of documented HS cases increased among privately and publicly insured patients between 2008–2017

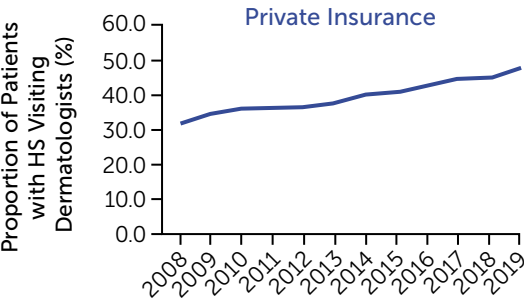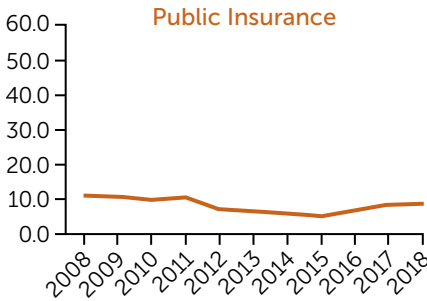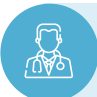

**Dermatologist Visits:** Dermatologist visits increased among privately insured patients but remained lower and overall unchanged among publicly insured patients between 2008–2018/2019

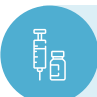

**Treatment Exposure:** Only 8.4% of privately insured patients, and 5.8% of publicly insured patients had exposure to any biologic treatment in 2018

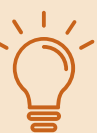

The care and treatment of HS has changed over the last decade, along with an **increase in the number of cases of HS** and **increased awareness** of the disease

However, **access to dermatologists and exposure to biologic treatments** is still **low overall** among both privately and publicly insured patients
